# Supplementary material
Source: publisher site journal article supplement (https://www.dovepress.com/article/274970)
Supplement: Supplementary file 1 [file get_supplementary_file.php]

**Supplementary Table 1. Baseline characteristics for participants**

| Hepatic function index (unit) (n) | HCC Patients after TACE |      | Hepatic function index (unit) (n) | HCC Patients after TACE |      |
|-----------------------------------|-------------------------|------|-----------------------------------|-------------------------|------|
|                                   | n <sub>0</sub>          | %    |                                   | n <sub>0</sub>          | %    |
| AFP (ng/mL)(106)                  |                         |      | TBIL (umol/L) (106)               |                         |      |
| Range                             | 0.23-2000               |      | Range                             | 7.3-34.1                |      |
| Median                            | 60.7                    |      | Median                            | 22.1                    |      |
| <60.7                             | 53                      | 50   | <22.1                             | 53                      | 50   |
| ≥60.7                             | 53                      | 50   | ≥22.1                             | 53                      | 50   |
| ALT (U/L)(106)                    |                         |      | DBIL(umol/L) (106)                |                         |      |
| Range                             | 10.7-523.1              |      | Range                             | 1.9-259.4               |      |
| Median                            | 46.9                    |      | Median                            | 7.7                     |      |
| <46.9                             | 52                      | 49.1 | <7.7                              | 53                      | 50   |
| ≥46.9                             | 54                      | 50.9 | ≥7.7                              | 53                      | 50   |
| AST (U/L) (106)                   |                         |      | IBIL(umol/L) (106)                |                         |      |
| Range                             | 13.8-1293.8             |      | Range                             | 2-81.7                  |      |
| Median                            | 52.8                    |      | Median                            | 12.2                    |      |
| <52.8                             | 53                      | 50   | <12.2                             | 51                      | 48.1 |
| ≥52.8                             | 53                      | 50   | ≥12.2                             | 55                      | 51.9 |
| ALT/AST (106)                     |                         |      | ALP(U/L) (106)                    |                         |      |
| Range                             | 0.3-4.2                 |      | Range                             | 38.8-548.5              |      |
| Median                            | 1.1                     |      | Median                            | 116.1                   |      |
| <1.1                              | 52                      | 49.1 | <116.1                            | 52                      | 49.1 |
| ≥1.1                              | 54                      | 50.9 | ≥116.1                            | 54                      | 50.9 |
| TP(g/L) (106)                     |                         |      | GGT(U/L) (106)                    |                         |      |
| Range                             | 30.1-108.5              |      | Range                             | 11.4-992.4              |      |
| Median                            | 63.6                    |      | Median                            | 79.8                    |      |
| <63.6                             | 53                      | 50   | <79.8                             | 53                      | 50   |
| ≥63.6                             | 53                      | 50   | ≥79.8                             | 53                      | 50   |
| ALB(g/L)(106)                     |                         |      | PAB(mg/L) (106)                   |                         |      |
| Range                             | 17.7-64.4               |      | Range                             | 35-365                  |      |
| Median                            | 35.4                    |      | Median                            | 174.5                   |      |
| <35.4                             | 52                      | 49.1 | <174.5                            | 53                      | 50   |
| ≥35.4                             | 54                      | 50.9 | ≥174.5                            | 53                      | 50   |
| GLB(g/L)(106)                     |                         |      | TBA(umol/L) (106)                 |                         |      |
| Range                             | 12.4-45.2               |      | Range                             | 0.2-115.9               |      |
| Median                            | 28.9                    |      | Median                            | 11.6                    |      |
| <28.9                             | 53                      | 50   | <11.6                             | 53                      | 50   |
| ≥28.9                             | 53                      | 50   | ≥11.6                             | 53                      | 50   |
| AG(106)                           |                         |      | ADA(U/L) (106)                    |                         |      |
| Range                             | 1.0-2                   |      | Range                             | 3-33.5                  |      |

|             |    |           |                |    |          |
|-------------|----|-----------|----------------|----|----------|
| Median      |    | 1.2       | Median         |    | 9.9      |
| <1.2        | 49 | 46.2      | <9.9           | 53 | 50       |
| ≥1.2        | 57 | 53.8      | ≥9.9           | 53 | 50       |
| PT(s) (106) |    |           | AFU(U/L) (106) |    |          |
| Range       |    | 12.4-25.0 | Range          |    | 8.2-90.5 |
| Median      |    | 14.4      | Median         |    | 37.3     |
| <14.4       | 52 | 49.1      | <37.1          | 53 | 50       |
| ≥14.4       | 54 | 50.9      | ≥37.1          | 53 | 50       |

Notes: Data are presented as n (%);

Abbreviations: HCC, hepatocellular carcinoma; PVTT, portal vein tumor thrombus; FIT, frequency of interventional treatment; AFP,  $\alpha$ -fetoprotein; ALT, alanine transaminase; AST, aspartate aminotransferase; TP, total protein; ALB, albumin; GLB, globulin; AG, ALB/GLB; GGT, gamma-glutamyl transpeptidase; TBIL, total bilirubin; DBIL, Direct Bilirubin; IBIL, indirect bilirubin; ALP, Alkaline Phosphatase; PAB, prealbumin; TBA, Total Bile Acid; ADA, adenosine deaminase; AFU, fucosidase; PT, prothrombin time; HE, hepatic encephalopathy; TACE, Transhepatic Arterial Chemotherapy And Embolization.

**Supplementary table 2a. Correlation analysis among liver function indexes and Child-pugh grade in HCC patients**

|                  | AFP     | ALT     | AST    | ALT/AST | TP      | Alb     | GLb     | AG      | PT     | TBIL    | DBIL    | IBIL   | ALP    | GGT    | PAB     | TBA    | ADA   | AFU   | Child-pugh grade |  |
|------------------|---------|---------|--------|---------|---------|---------|---------|---------|--------|---------|---------|--------|--------|--------|---------|--------|-------|-------|------------------|--|
| AFP              | 1       |         |        |         |         |         |         |         |        |         |         |        |        |        |         |        |       |       |                  |  |
| ALT              | .351**  | 1       |        |         |         |         |         |         |        |         |         |        |        |        |         |        |       |       |                  |  |
| AST              | .400**  | .792**  | 1      |         |         |         |         |         |        |         |         |        |        |        |         |        |       |       |                  |  |
| ALT/AST          | -0.06   | -.522** | 0.013  | 1       |         |         |         |         |        |         |         |        |        |        |         |        |       |       |                  |  |
| TP               | -.193*  | -0.113  | -0.036 | 0.056   | 1       |         |         |         |        |         |         |        |        |        |         |        |       |       |                  |  |
| Alb              | -.255** | -.269** | -.212* | 0.075   | .685**  | 1       |         |         |        |         |         |        |        |        |         |        |       |       |                  |  |
| GLb              | -0.043  | 0.071   | 0.125  | -0.018  | .778**  | 0.131   | 1       |         |        |         |         |        |        |        |         |        |       |       |                  |  |
| AG               | -0.094  | -.200*  | -.198* | 0.067   | -.202*  | .520**  | -.744** | 1       |        |         |         |        |        |        |         |        |       |       |                  |  |
| PT               | 0.081   | 0.02    | -0.016 | -0.106  | -0.046  | -0.103  | 0.002   | -0.057  | 1      |         |         |        |        |        |         |        |       |       |                  |  |
| TBIL             | .341**  | .431**  | .463** | -0.025  | -.304** | -.435** | -0.054  | -.235*  | 0.137  | 1       |         |        |        |        |         |        |       |       |                  |  |
| DBIL             | .381**  | .493**  | .501** | -0.095  | -.276** | -.440** | 0.012   | -.294** | 0.086  | .876**  | 1       |        |        |        |         |        |       |       |                  |  |
| IBIL             | .223*   | .250**  | .267** | -0.014  | -.232*  | -.252** | -0.107  | -0.088  | 0.089  | .808**  | .547**  | 1      |        |        |         |        |       |       |                  |  |
| ALP              | .262**  | .372**  | .413** | -0.099  | 0.113   | -0.085  | .252**  | -.259** | -0.051 | .263**  | .395**  | 0.034  | 1      |        |         |        |       |       |                  |  |
| GGT              | .360**  | .540**  | .550** | -0.153  | -0.052  | -.235*  | 0.156   | -.263** | -0.041 | .423**  | .535**  | 0.18   | .703** | 1      |         |        |       |       |                  |  |
| PAB              | -.234*  | -0.114  | -0.175 | -0.081  | .314**  | .523**  | 0.007   | .306**  | -0.186 | -.325** | -.325** | -0.188 | -0.062 | -0.176 | 1       |        |       |       |                  |  |
| TBA              | .240*   | .241*   | .243*  | -0.049  | -0.087  | -.344** | 0.188   | -.377** | .261** | .518**  | .518**  | .423** | .200*  | .277** | -.263** | 1      |       |       |                  |  |
| ADA              | .271**  | .425**  | .439** | -0.086  | 0.088   | -0.108  | .223*   | -.253** | .239*  | .322**  | .376**  | 0.134  | .338** | .314** | -0.139  | .239*  | 1     |       |                  |  |
| AFU              | 0.095   | 0.135   | 0.158  | -0.05   | -0.044  | -0.057  | 0.016   | -0.005  | -0.078 | 0.12    | 0.14    | 0.156  | .249*  | .276** | -0.047  | .198*  | 0.115 | 1     |                  |  |
| Child-pugh grade | .342**  | .308**  | .234*  | -0.151  | -.540** | -.583** | -.259** | -0.12   | .462** | .523**  | .445**  | .389** | 0.036  | .282** | -.332** | .406** | .248* | 0.115 | 1                |  |

**Supplementary table 2b. Correlation analysis between image data and Child-pugh grade in HCC patients**

|                  | Sex    | Age     | Cirrhosis | splenomegaly | Tumor diameter | Tumor number | metastasis | PVTT  | ascites | HE     | <b>FIT</b> | Child-pugh grade |
|------------------|--------|---------|-----------|--------------|----------------|--------------|------------|-------|---------|--------|------------|------------------|
| Sex              | 1      |         |           |              |                |              |            |       |         |        |            |                  |
| Age              | 0.147  | 1       |           |              |                |              |            |       |         |        |            |                  |
| Cirrhosis        | -0.185 | -.358** | 1         |              |                |              |            |       |         |        |            |                  |
| splenomegaly     | 0.005  | -.365** | .621**    | 1            |                |              |            |       |         |        |            |                  |
| Tumor diameter   | -0.039 | -0.044  | -.236*    | -0.064       | 1              |              |            |       |         |        |            |                  |
| Tumor number     | -0.157 | 0.016   | 0.183     | 0.103        | -0.041         | 1            |            |       |         |        |            |                  |
| metastasis       | 0.109  | 0.007   | 0.057     | 0.144        | 0.142          | .289**       | 1          |       |         |        |            |                  |
| PVTT             | -0.137 | -.242*  | .191*     | .349**       | .202*          | .204*        | .222*      | 1     |         |        |            |                  |
| ascites          | -0.101 | -.255** | .214*     | .293**       | 0.101          | 0.136        | 0.152      | 0.176 | 1       |        |            |                  |
| HE               | -0.019 | -0.181  | 0.073     | -0.086       | -0.007         | -0.023       | -0.063     | 0.112 | 0.19    | 1      |            |                  |
| <b>FIT</b>       | 0.091  | 0.058   | 0.066     | 0.059        | -0.048         | 0.038        | .217*      | 0.02  | 0.072   | 0.042  | 1          |                  |
| Child-pugh grade | -0.116 | -.339** | .423**    | .383**       | 0.022          | 0.162        | 0.084      | .218* | .696**  | .337** | 0.053      | 1                |

Note: \*: P<0.05; \*\*P<0.01;

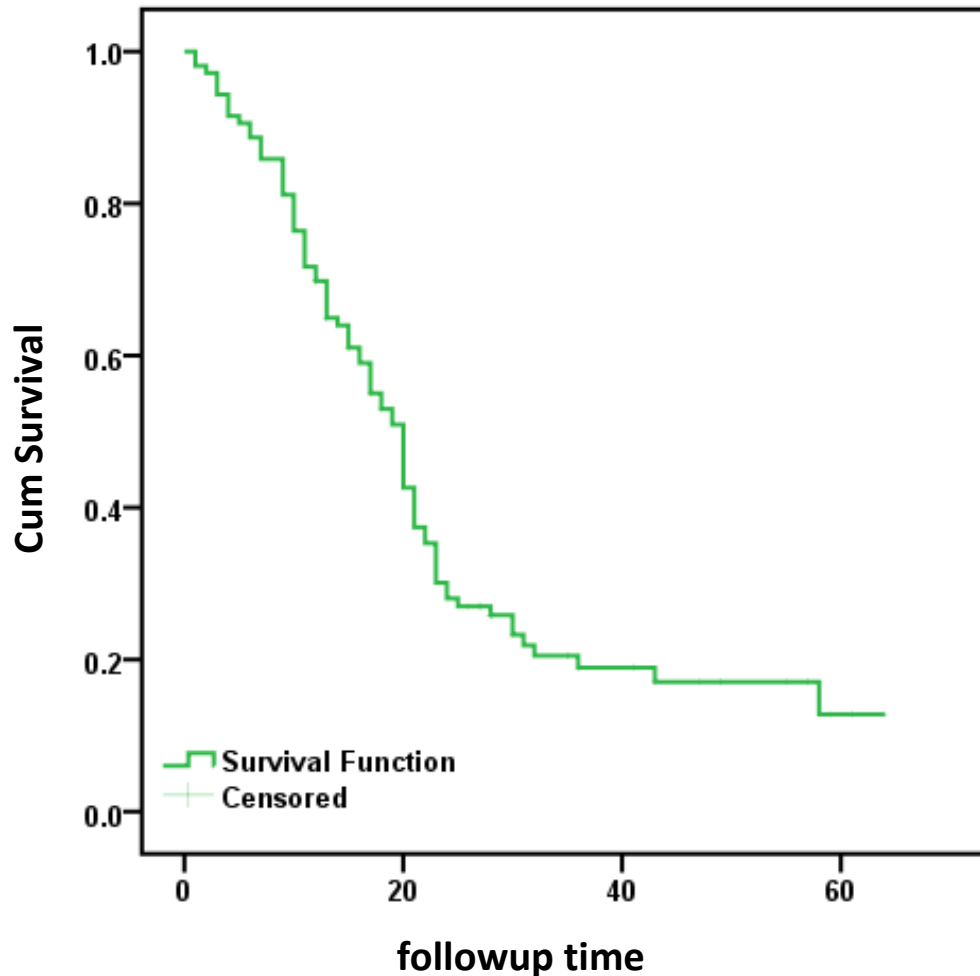

**Supplementary Figure 1** The total survival trend of HCC patients. The longest survival time of patients with HCC after surgery has reached 64 months. On September 1, in 2019, 24 (22.6%) HCC patients were still alive, whereas 82 (77.4%) had died. Follow-up ranged from 0 to 64 months after surgery until September, 2019. 1, 3, 5-year overall survival rate are respectively 69.8%,18.9%, 12.8%.

a

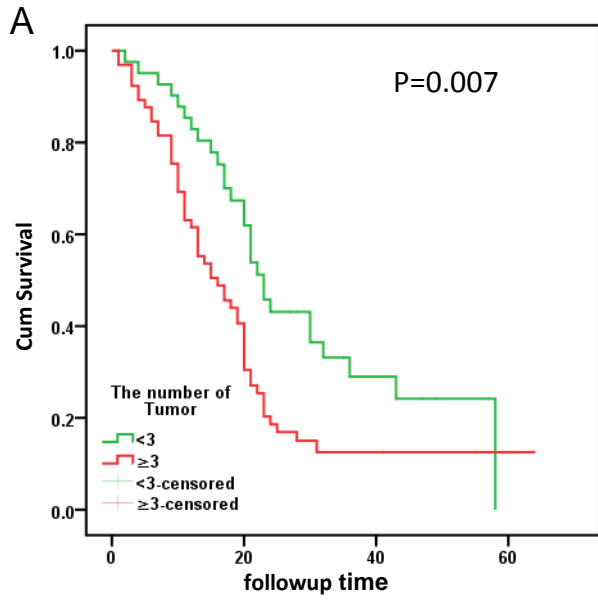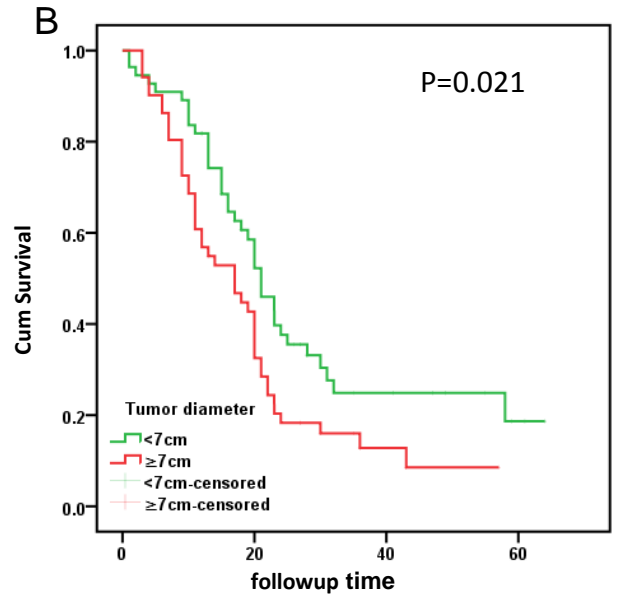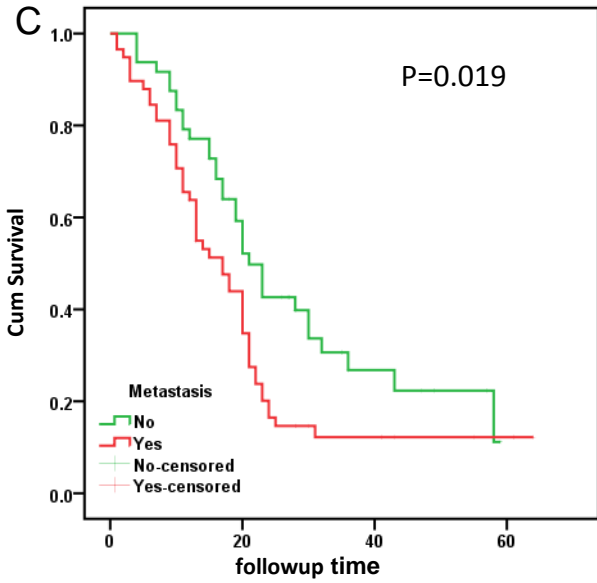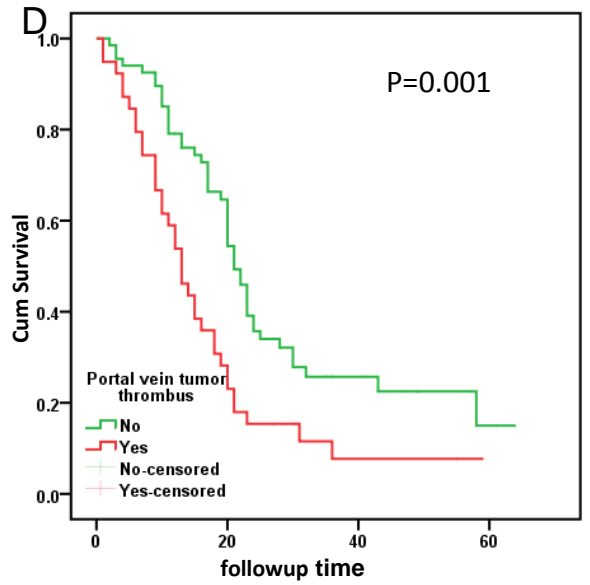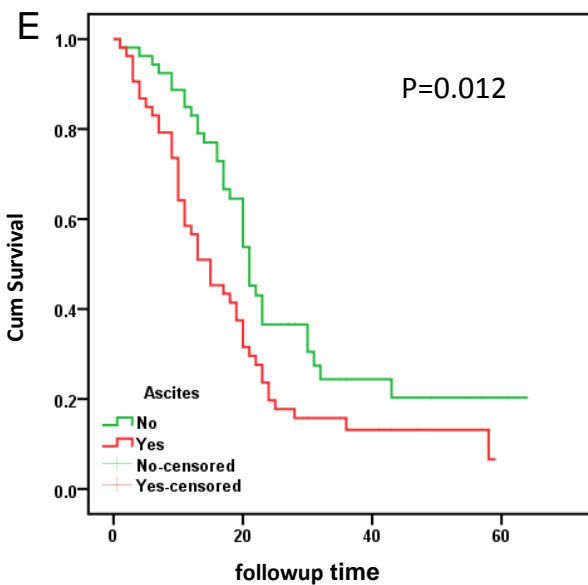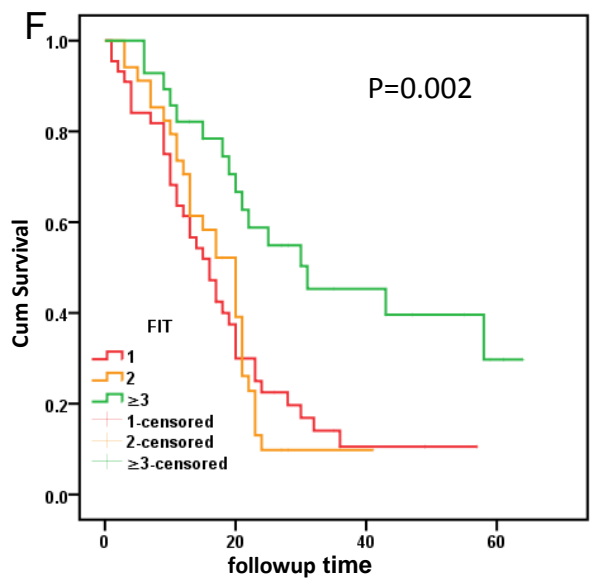

b

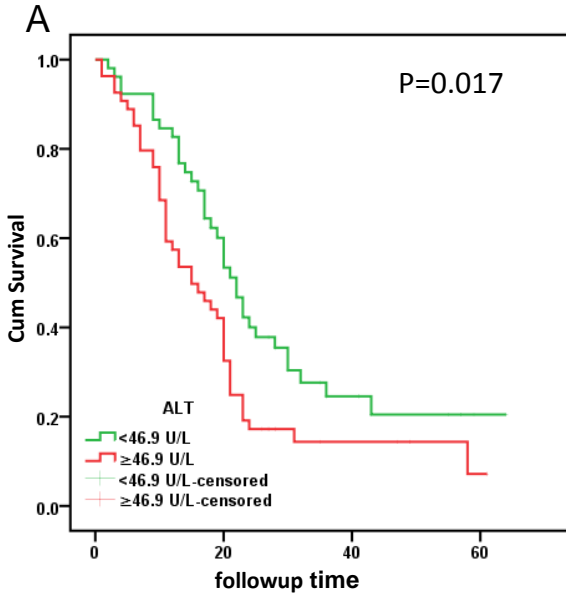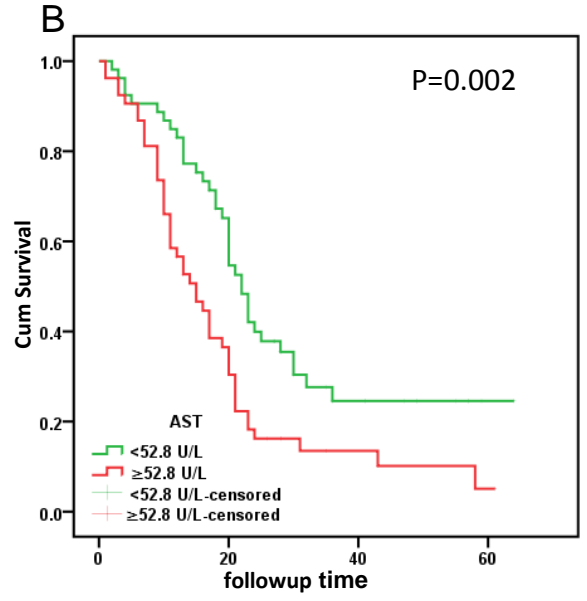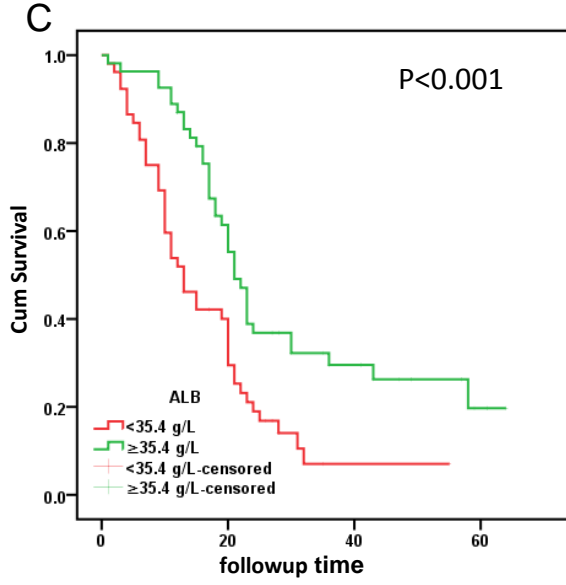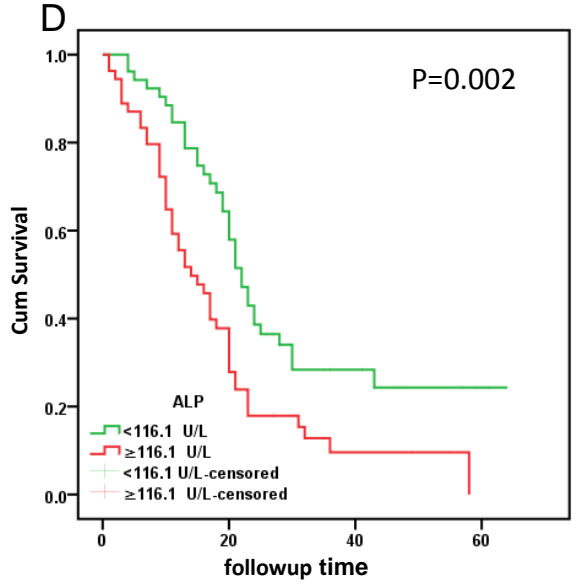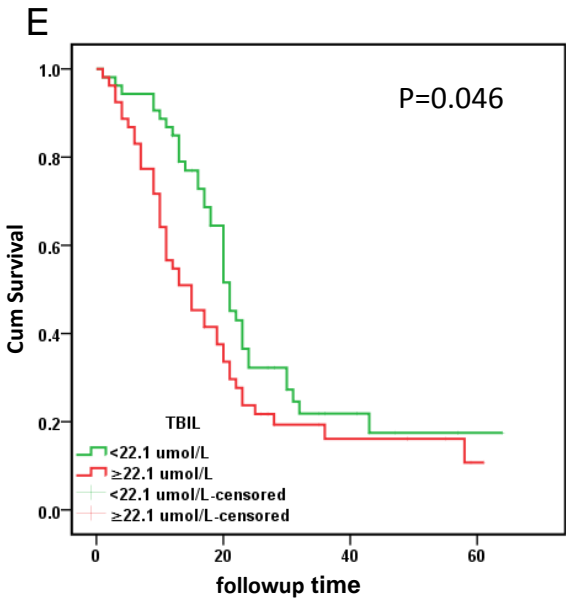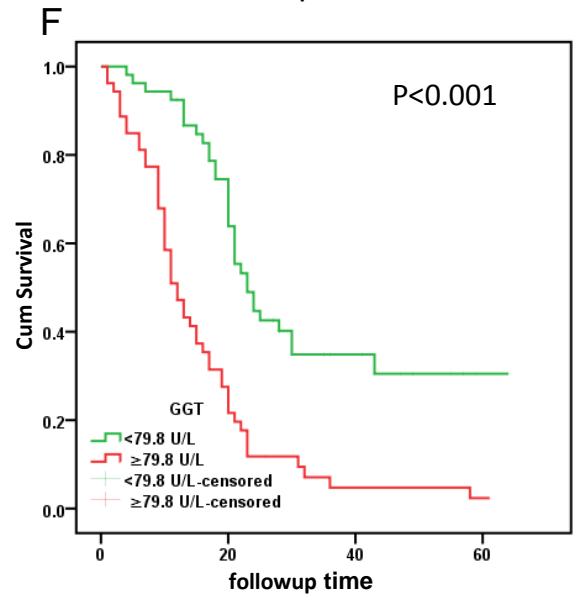

b

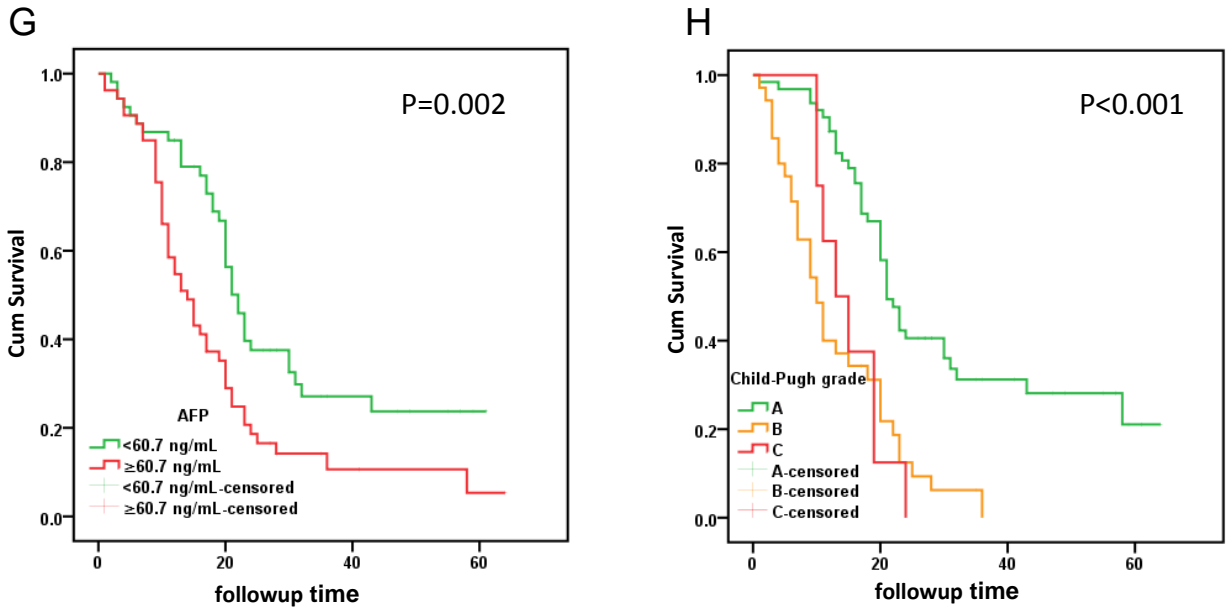

**Supplementary Figure 2** Basic information, imaging data, and liver function blood indicators correlate with survival in patients with HCC. Mainly include the following indicators that are meaningful for survival and prognosis: a. Basic information and imaging data: the number of tumors, Tumor diameter, metastasis, PVTT, ascites and FIT; b. liver function blood indicators :ALT, AST, ALB, ALP, TBIL, GGT, AFP and the Child -Pugh grade.



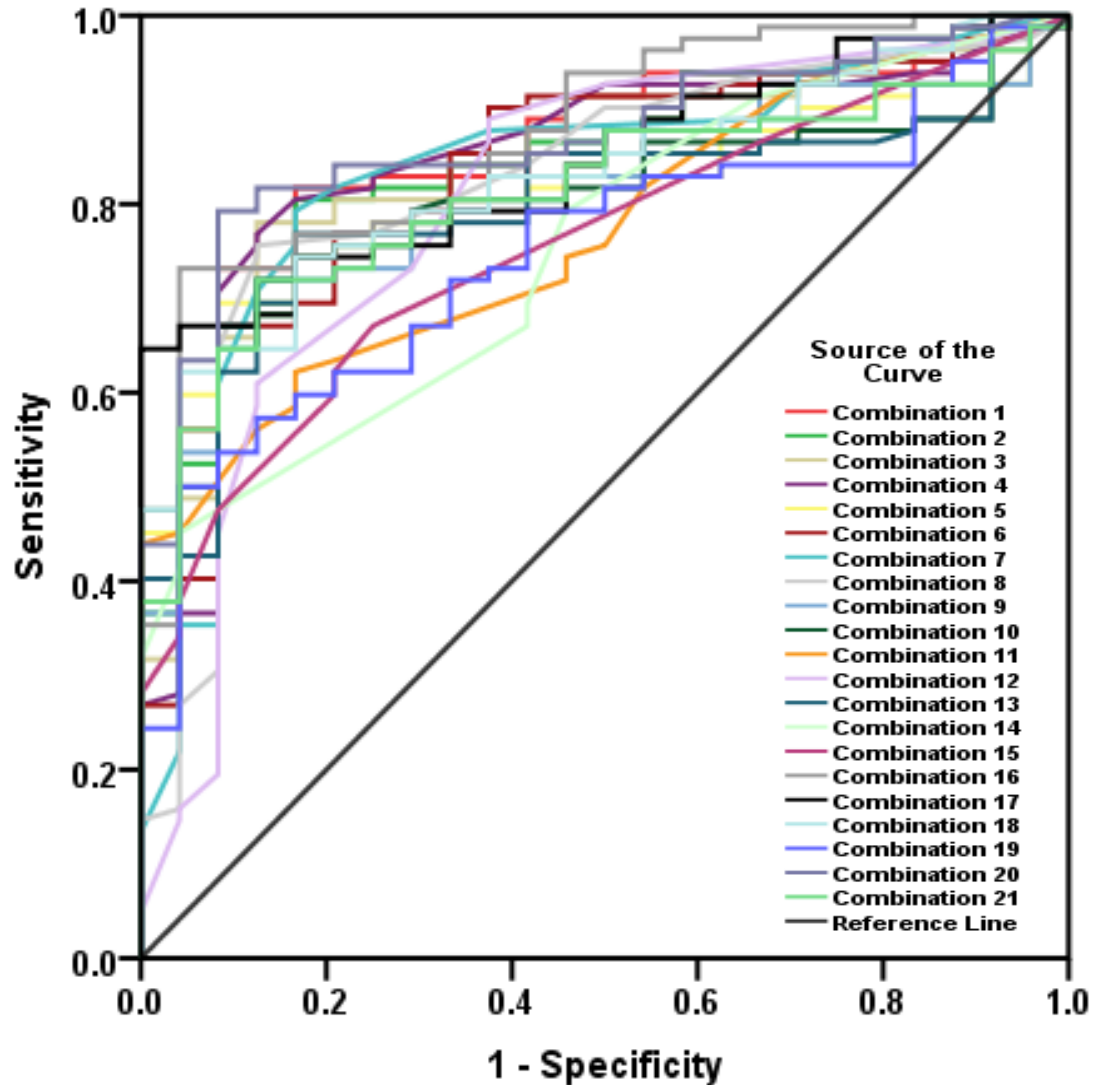

**Supplementary Figure 3** ROC curves reveal performance abilities for 21 combinations affecting patient survival. As shown, the diagonal black line is the reference line and, combination 16 has the largest AUC (AUC = 0.872) followed by combination 20 (AUC = 0.869), combination 1 ( AUC = 0.856), (see Table 4 for statistical comparisons).
